# Supplementary material for: The tetrahedral structure and luminescence properties of Bi-metallic Pt1Ag28(SR)18(PPh3)4 nanocluster
Source: PubMed Central journal article supplement (PMC5431686; doi:10.1039/c6sc05104a), 2017-01-05
Supplement: SC-008-C6SC05104A-s001.pdf [file SC-008-C6SC05104A-s001.pdf]

**Supporting Information:**

**Tetrahedral Structure and Luminescence Properties of  
Bi-Metallic Pt<sub>1</sub>Ag<sub>28</sub>(SR)<sub>18</sub>(PPh<sub>3</sub>)<sub>4</sub> Nanocluster**

Xi Kang,<sup>a</sup> Meng Zhou,<sup>b</sup> Shuxin Wang,<sup>a</sup> Shan Jin,<sup>a</sup> Guodong Sun,<sup>a</sup> Manzhou Zhu<sup>a,\*</sup> & Rongchao Jin<sup>b,\*</sup>

<sup>a</sup>Department of Chemistry and Center for Atomic Engineering of Advanced Materials, Anhui University, Hefei, Anhui 230601, China.

<sup>b</sup>Department of Chemistry, Carnegie Mellon University, Pittsburgh, Pennsylvania 15213, United States.

**Structural analyses of Pt<sub>1</sub>Ag<sub>28</sub>, Au<sub>1</sub>Ag<sub>28</sub> and Ag<sub>29</sub>**

Structurally, the previous studies suggested that the structure and composition of the metal core significantly affect the M-S bond lengths. Thus the bond lengths and angles in Pt<sub>1</sub>Ag<sub>28</sub> were compared with the related ones in Ag<sub>29</sub> and Au<sub>1</sub>Ag<sub>28</sub> (Table S2). Compared the bond lengths in Pt<sub>1</sub>Ag<sub>28</sub> with Ag<sub>29</sub> and Au<sub>1</sub>Ag<sub>28</sub>, the range is larger (Au<sub>1</sub>Ag<sub>28</sub> is similar with Ag<sub>29</sub> owing to the almost identified framework) although the average bond length is very similar. Regarding to the angles of P-Ag-S on the same motifs, the average angles of Ag<sub>29</sub> and Pt<sub>1</sub>Ag<sub>28</sub> is 106.91° and 105.94°, respectively. However the average angles in Pt<sub>1</sub>Ag<sub>28</sub> is 126.80, which varies substantially with Ag<sub>29</sub> (Au<sub>1</sub>Ag<sub>28</sub>).

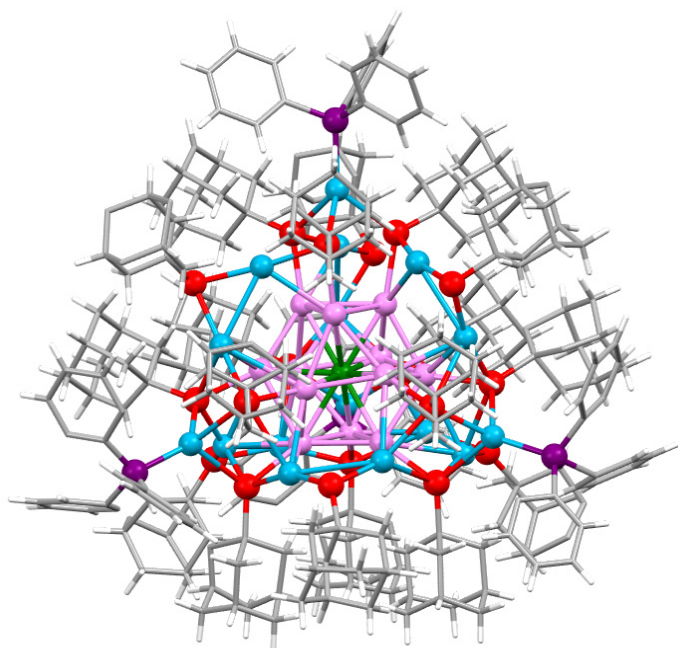

**Fig. S1.** The total structure of Pt<sub>1</sub>Ag<sub>28</sub>(S-Adm)<sub>18</sub>(PPh<sub>3</sub>)<sub>4</sub>. Color legend: green sphere, Pt; cerulean sphere, Ag on the shell; violet sphere, Ag in the kernel; red sphere, S; purple sphere, P. For clarity, C and H are shown in wireframe.

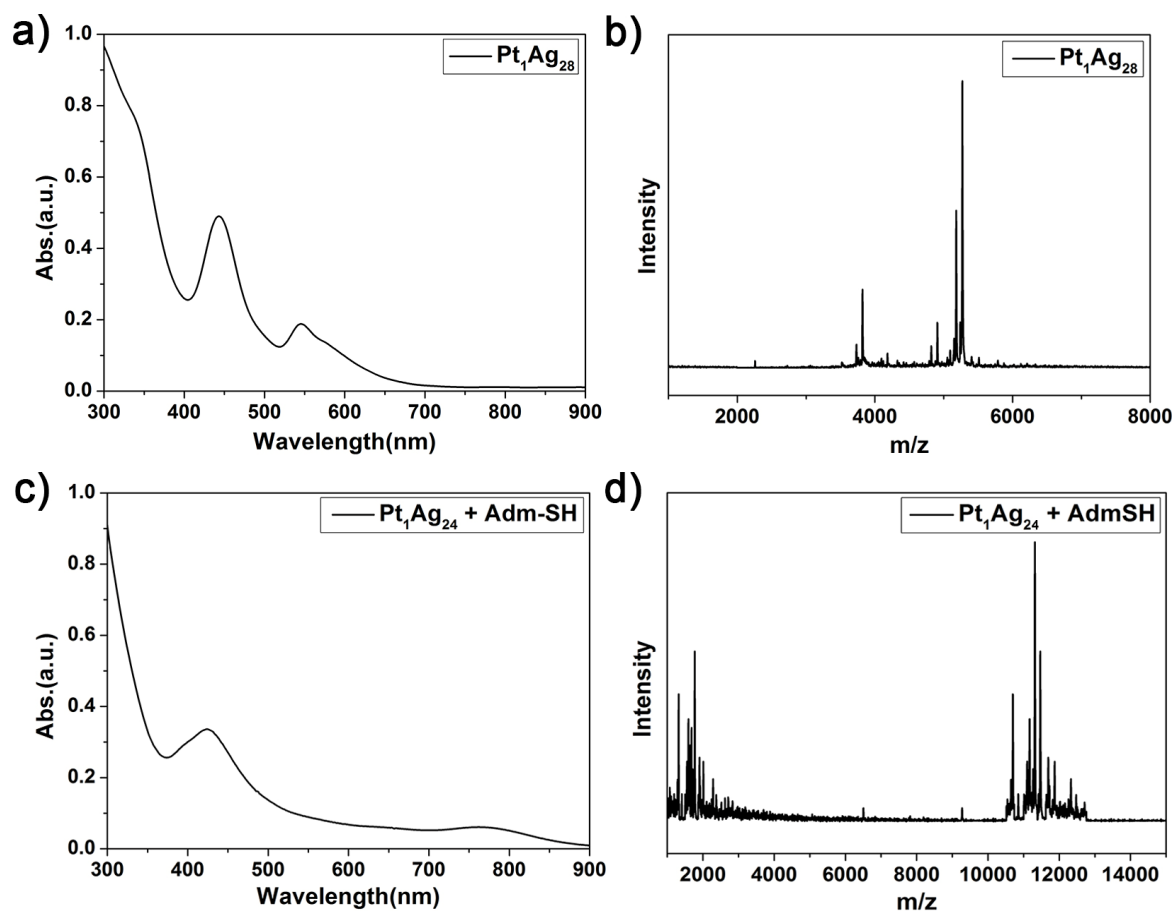

**Fig. S2.** a) UV-Vis spectrum of  $Pt_1Ag_{28}$ ; b) MALDI-MS spectrum of  $Pt_1Ag_{28}$ ; c) UV-Vis spectrum of  $Pt_1Ag_{24}$  etching by Adm-SH only ; d) MALDI-MS spectrum of  $Pt_1Ag_{24}$  etching by Adm-SH only.

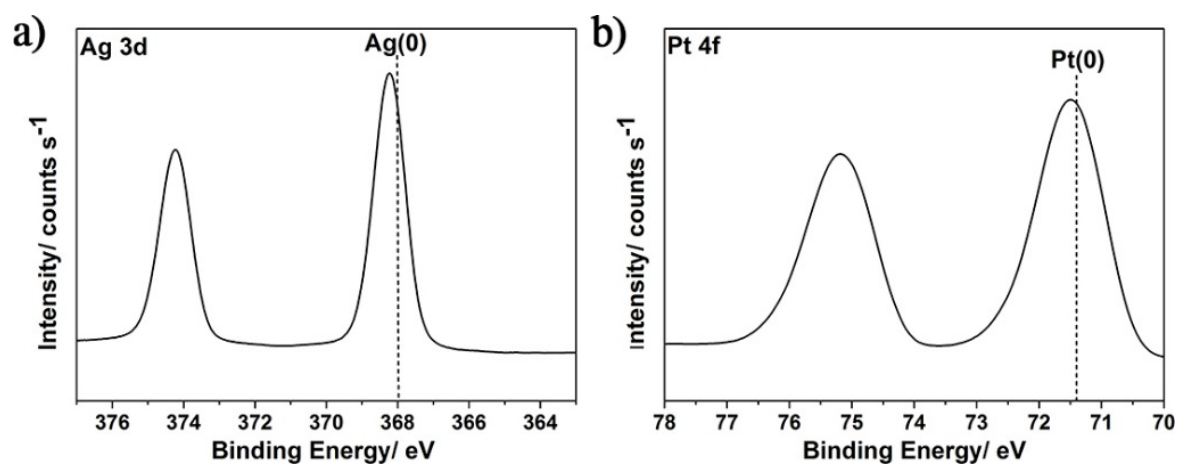

**Fig. S3.** X-ray photoelectron spectroscopy (XPS) of a) Ag 3d, b) Pt 4f in  $Pt_1Ag_{28}(S-Adm)_{18}(PPh_3)_4$  nanocluster.

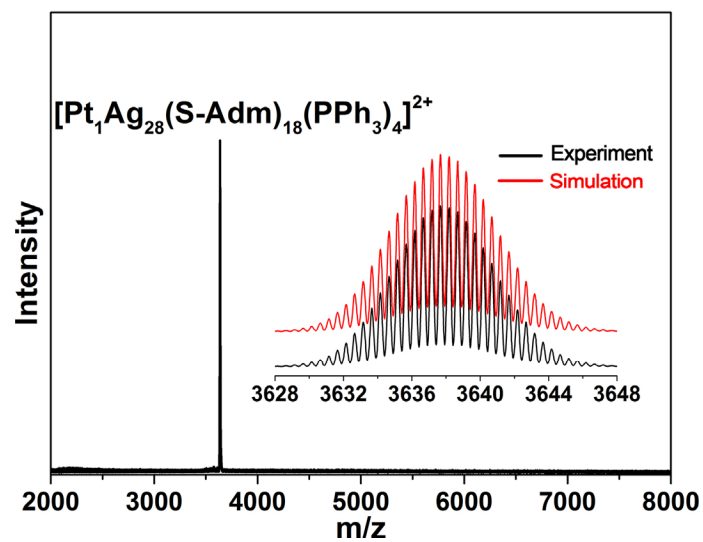

**Fig. S4.** ESI-MS mass spectrum of  $\text{Pt}_1\text{Ag}_{28}$  in positive-mode. Insets: the experimental (black) and simulated (red) isotope patterns of  $\text{Pt}_1\text{Ag}_{28}$ .

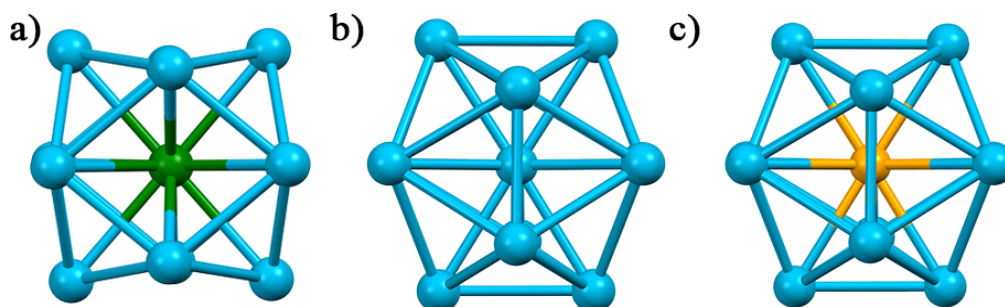

**Fig. S5.** The  $\text{M}_{13}$  kernel of a)  $\text{Pt}_1\text{Ag}_{28}$ , b)  $\text{Ag}_{29}$  and c)  $\text{Au}_1\text{Ag}_{28}$  nanoclusters. Color legend: green sphere, Pt; cerulean sphere, Ag.

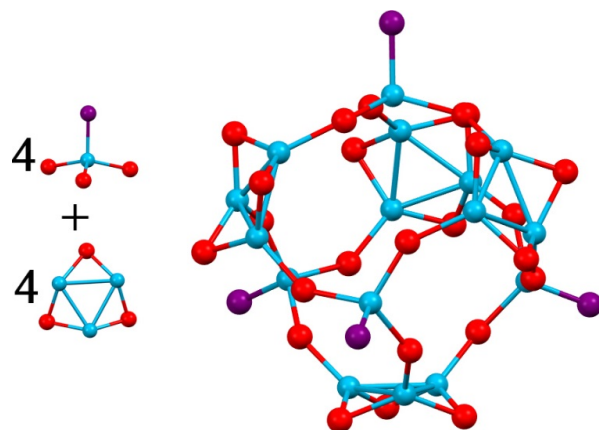

**Fig. S6.** The motifs in  $\text{Ag}_{29}$  and  $\text{Au}_1\text{Ag}_{28}$  nanoclusters. The overall motif could be separated into 4  $\text{Ag}_1\text{S}_3\text{P}_1$  and 4  $\text{Ag}_3\text{S}_3$  motifs. Color legend: cerulean sphere, Ag; red sphere, S; purple sphere, P.

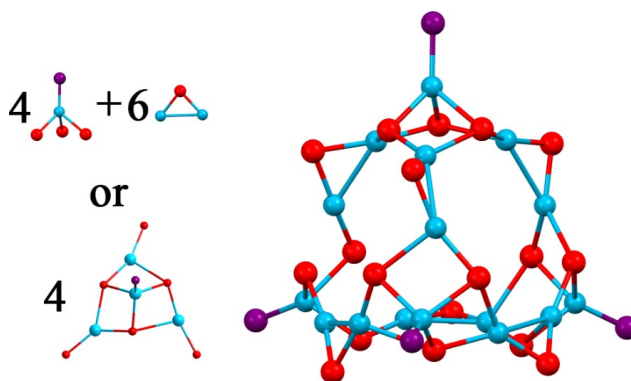

**Fig. S7.** The motifs in  $\text{Pt}_1\text{Ag}_{28}$  nanocluster. The overall motif could be separated into 4  $\text{Ag}_1\text{S}_3\text{P}_1$  and 6  $\text{Ag}_2\text{S}_1$  motifs or 4  $\text{Ag}_4\text{S}_6\text{P}_1$  motifs sharing 6 S atoms. Color legend: cerulean sphere, Ag; red sphere, S; purple sphere, P.

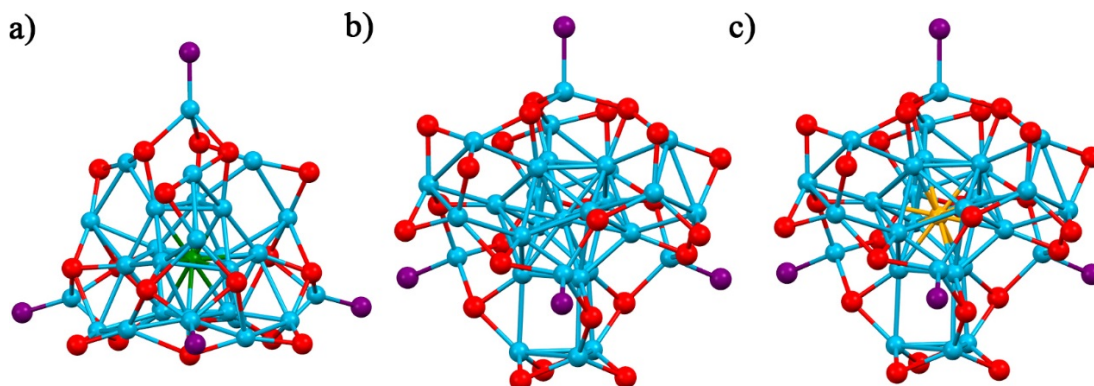

**Fig. S8.** Total structure of a)  $\text{Pt}_1\text{Ag}_{28}$ , b)  $\text{Ag}_{29}$  and c)  $\text{Au}_1\text{Ag}_{28}$  nanoclusters. Color legend: green sphere, Pt; cerulean sphere, Ag; orange sphere, Au; red sphere, S; purple sphere, P. For clarity, C and H are not shown.

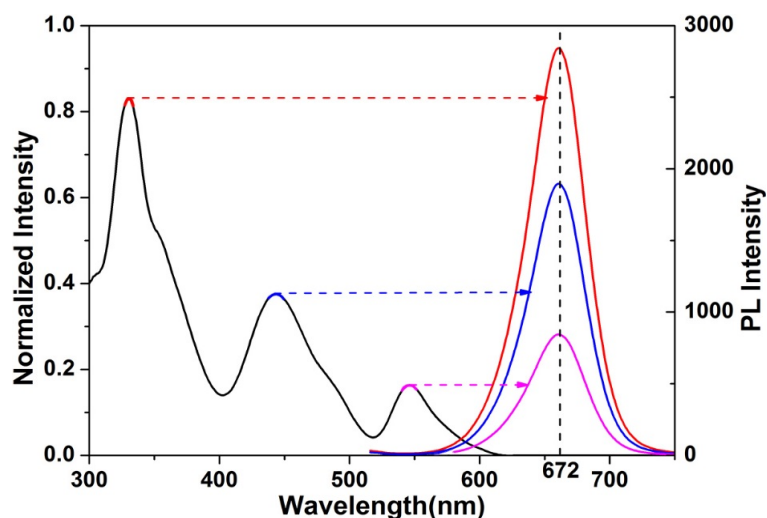

**Fig. S9.** Photoluminescence properties of  $\text{Pt}_1\text{Ag}_{28}(\text{S-Adm})_{18}(\text{PPh}_3)_4$ . Excitation spectrum (left) and emission spectra (right) at different excitation wavelengths, as indicated by the arrows.

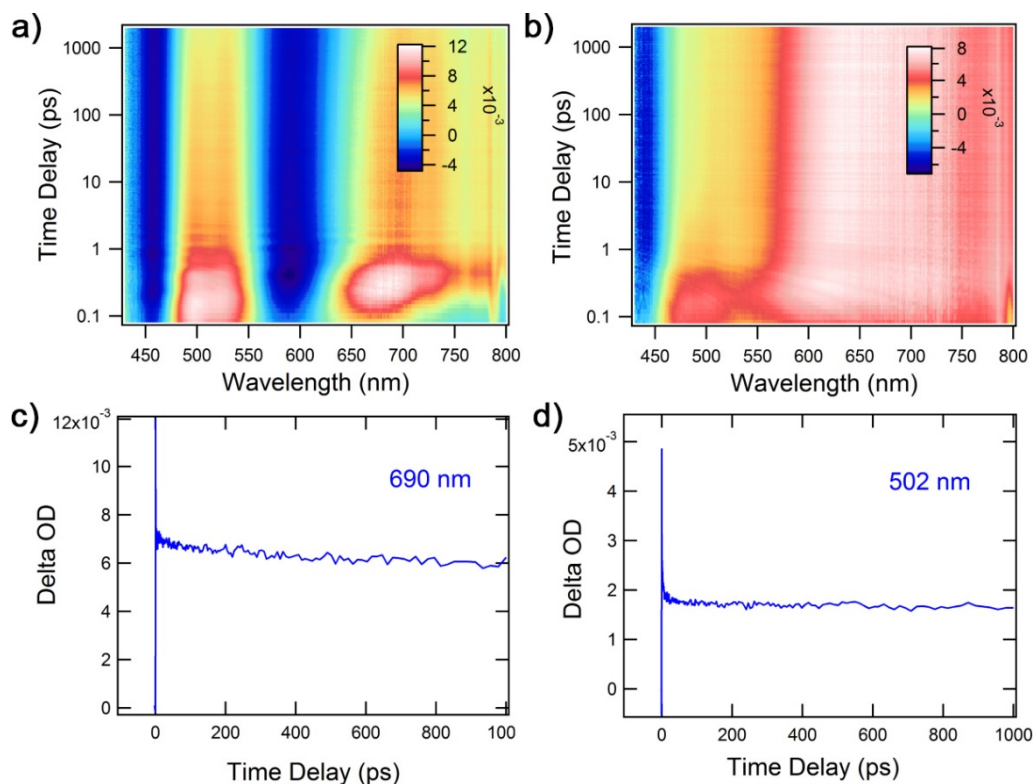

**Fig. S10.** Femtosecond transient absorption data map at all time delays (0.1 ps to 3 ns) and probe wavelengths for a)  $\text{Pt}_1\text{Ag}_{24}$  and b)  $\text{Pt}_1\text{Ag}_{28}$  nanoclusters with excitation of 360 nm. c, d) Kinetic traces at selected wavelengths between -1 ps and 1 ns for c)  $\text{Pt}_1\text{Ag}_{24}$  and d)  $\text{Pt}_1\text{Ag}_{28}$ .

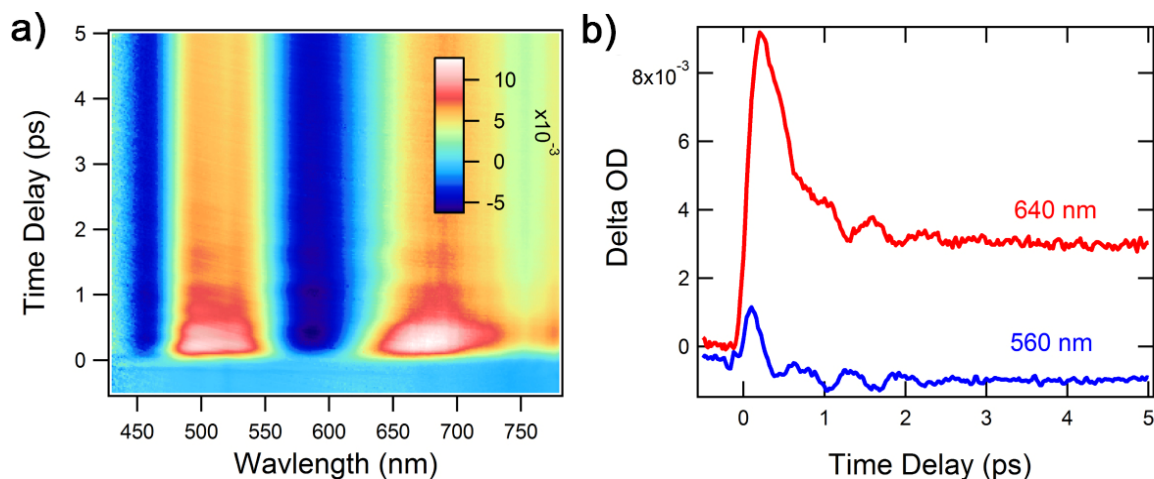

**Fig. S11.** a) Femtosecond transient absorption data map of Pt<sub>1</sub>Ag<sub>24</sub> at early time delays (-0.5 ps to 5 ps). b) Coherent oscillations observed in kinetic traces at selected wavelengths.

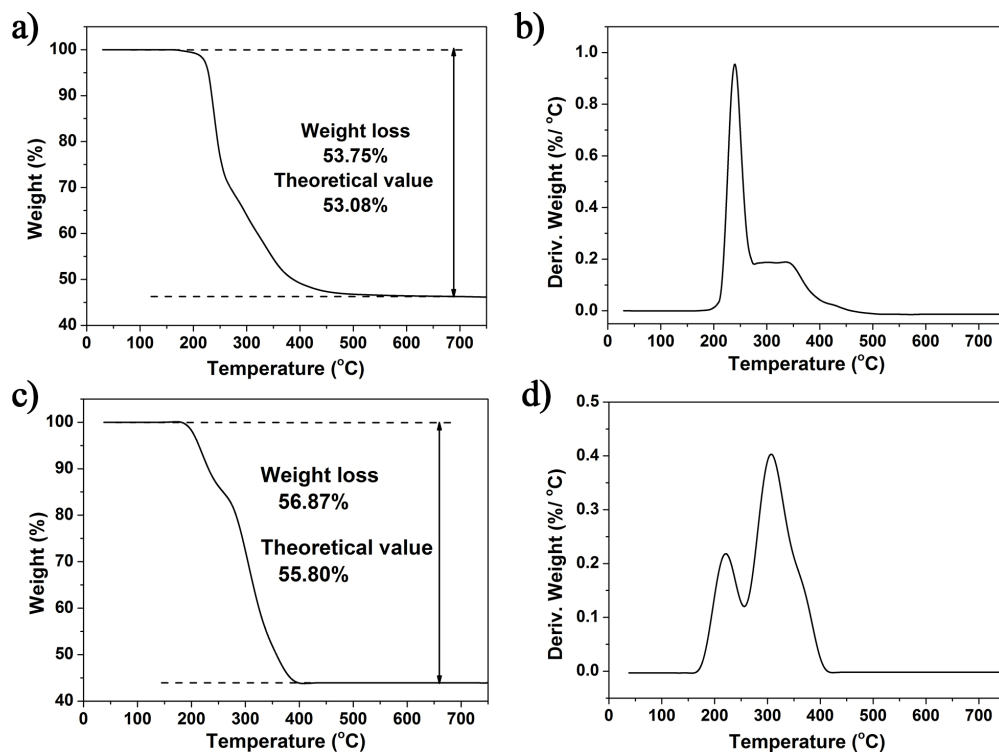

**Fig. S12.** a) TGA curve and b) the derivative of Pt<sub>1</sub>Ag<sub>24</sub>; c) TGA curve and d) the derivative of Pt<sub>1</sub>Ag<sub>28</sub>.

**Table S1.** The atom ratio of Pt and Ag in  $\text{Pt}_1\text{Ag}_{28}(\text{S-Adm})_{18}(\text{PPh}_3)_4$  nanocluster calculated from inductively coupled plasma (ICP) and X-ray photoelectric spectroscopy (XPS) measurements.

|                                                                                        | Pt atom     | Ag atom       |
|----------------------------------------------------------------------------------------|-------------|---------------|
| ICP Experiment ratio of $\text{Pt}_1\text{Ag}_{28}(\text{S-Adm})_{18}(\text{PPh}_3)_4$ | 3.9%        | 96.1%         |
| XPS Experiment ratio of $\text{Pt}_1\text{Ag}_{28}(\text{S-Adm})_{18}(\text{PPh}_3)_4$ | 3.5%        | 96.5%         |
| Theoretical ratio of $\text{Pt}_1\text{Ag}_{28}(\text{S-Adm})_{18}(\text{PPh}_3)_4$    | 1/29(3.45%) | 28/29(96.55%) |

**Table S2.** Structural analysis of  $\text{Ag}_{29}$ ,  $\text{Au}_1\text{Ag}_{28}$  and  $\text{Pt}_1\text{Ag}_{28}$  nanoclusters.

|                             | M(center)-Ag lengths in the kernel (Å) | Ag-S lengths on the kernel-shell (Å) | Ag-Ag lengths on the kernel-shell (Å) | P-Ag-S angles on the same motifs (°) |
|-----------------------------|----------------------------------------|--------------------------------------|---------------------------------------|--------------------------------------|
| $\text{Ag}_{29}$            | 2.755-2.772                            | 2.433-2.474                          | 3.077-3.158                           | 104.12-109.19                        |
| Averages                    | 2.765                                  | 2.459                                | 3.111                                 | 106.91                               |
| $\text{Au}_1\text{Ag}_{28}$ | 2.745-2.775                            | 2.425-2.472                          | 3.123-3.161                           | 104.50-108.63                        |
| Averages                    | 2.761                                  | 2.444                                | 3.141                                 | 105.94                               |
| $\text{Pt}_1\text{Ag}_{28}$ | 2.768-2.797                            | 2.438-2.498                          | 2.934-3.157                           | 119.28-131.46                        |
| Averages                    | 2.783                                  | 2.472                                | 3.104                                 | 126.80                               |

**Table S3.** Excited state lifetimes of silver and doped silver nanoclusters.

| Sample                      | Excited State Lifetimes   |
|-----------------------------|---------------------------|
| $\text{Ag}_{25}^{[1]}$      | 1.1 $\mu\text{s}$         |
| $\text{Pt}_1\text{Ag}_{24}$ | 1.9 $\mu\text{s}$         |
| $\text{Ag}_{29}^{[2]}$      | 350 ns                    |
| $\text{Pt}_1\text{Ag}_{28}$ | 300 ns, 2.9 $\mu\text{s}$ |

**Table S4:** Crystal data and structure refinement for the Pt<sub>1</sub>Ag<sub>28</sub>(S-Adm)<sub>18</sub>(PPh<sub>3</sub>)<sub>4</sub> nanocluster.

|                                   |                                                                                              |
|-----------------------------------|----------------------------------------------------------------------------------------------|
| Compound reference                | Pt <sub>1</sub> Ag <sub>28</sub> (S-Adm) <sub>18</sub> (PPh <sub>3</sub> ) <sub>4</sub>      |
| Empirical formula                 | C <sub>252</sub> H <sub>330</sub> Ag <sub>28</sub> Pt <sub>4</sub> S <sub>18</sub>           |
| Formula weight                    | 7275.55                                                                                      |
| Temperature                       | 143 K                                                                                        |
| Wavelength                        | 1.54178 Å                                                                                    |
| Crystal system                    | Monoclinic                                                                                   |
| Space group                       | C 2/c                                                                                        |
| Unit cell dimensions              | A=50.8135 (18) Å      α=90°<br>B=29.3497(8)Å      β=110.274(4)°<br>C=49.1614(16)Å      γ=90° |
| Volume                            | 68775(4) Å <sup>3</sup>                                                                      |
| Z                                 | 8                                                                                            |
| Density (calculated)              | 1.405 Mg m <sup>-3</sup>                                                                     |
| Absorption coefficient            | 14.666 mm <sup>-1</sup>                                                                      |
| F(000)                            | 28272                                                                                        |
| Crystal size                      | 0.05 × 0.03 × 0.02 mm <sup>3</sup>                                                           |
| Theta range for data collection   | 3.01 to 55.95°                                                                               |
| Index ranges                      | -63 ≤ h ≤ 59, -34 ≤ k ≤ 36, -57 ≤ l ≤ 61                                                     |
| Reflections collected             | 239535                                                                                       |
| Independent reflections           | 67855                                                                                        |
| Absorption correction             | Multi scan                                                                                   |
| Refinement method                 | SHELXL-2014/7 (Sheldrick 2014/7)                                                             |
| Data / restraints / parameters    | 67855 / 8 / 2728                                                                             |
| Goodness-of-fit on F <sup>2</sup> | 1.048                                                                                        |
| Final R indices [I > 2σ(I)]       | R1=0.0333, wR2=0.0845                                                                        |
| R indices (all data)              | R1=0.0432, wR2=0.0867                                                                        |

## References.

- [1] Bootharaju, M. S., Joshi, C. P., Parida, M. R., Mohammed, O. F. & Bakr, O. M. Templated atom-precise galvanic synthesis and structure elucidation of a [Ag<sub>24</sub>Au(SR)<sub>18</sub>] nanocluster. *Angew. Chem. Int. Ed.* **55**, 922-926 (2016).
- [2] Soldan, G., Aljuhani, M. A., Bootharaju, M. S., AbdulHalim, L. G., Parida, M. R., Emwas, A. –H., Mohammed, O. F. & Bakr, O. M. Gold doping of silver nanoclusters: a 26-fold enhancement in the luminescence quantum yield. *Angew. Chem. Int. Ed.* **55**, 5749-5753 (2016).
- [3] AbdulHalim, L. G., Bootharaju, M. S., Tang, Q., Gobbo, S. D., AbdulHalim, R. G., Eddaoudi, M., Jiang, D. –en. & Bakr, O. M. Ag<sub>29</sub>(BDT)<sub>12</sub>(TPP)<sub>4</sub>: a tetravalent nanocluster. *J. Am. Chem. Soc.* **137**, 11970-11975 (2015).
